# Supplementary material for: Menstrual factors, reproductive history, and risk of lung cancer: a multi-center population-based cohort study in Chinese females
Source: PubMed Central journal article supplement — Transl Lung Cancer Res. 2021 Oct;10(10):3912–28. doi: 10.21037/tlcr-21-552 (PMC8577983; doi:10.21037/tlcr-21-552), 2021-10
Supplement: tlcr-10-10-3912-dss.pdf [file tlcr-10-10-3912-dss.pdf]

## Data Sharing Statement

|                     |                                                                                                                                                    |                                                                                                                                                                                               |
|---------------------|----------------------------------------------------------------------------------------------------------------------------------------------------|-----------------------------------------------------------------------------------------------------------------------------------------------------------------------------------------------|
| <b>Article Info</b> | <a href="https://dx.doi.org/10.21037/tlcr-21-552">https://dx.doi.org/10.21037/tlcr-21-552</a>                                                      |                                                                                                                                                                                               |
| <b>Item</b>         | <b>Question</b>                                                                                                                                    | <b>Authors' Response<br/>(place "-" if not applicable)</b>                                                                                                                                    |
| 1                   | Would you like to share data collected for your study to others?                                                                                   | Yes.                                                                                                                                                                                          |
| 2                   | If not, would you like to share the reason for your decision?                                                                                      | -                                                                                                                                                                                             |
| 3                   | What data in particular will be shared?                                                                                                            | Unless the analyzed datasets generated during the study are available from the corresponding author on reasonable request, data collected for the study will not be made available to others. |
| 4                   | Any other documents will be share? Such as study protocol, statistical analysis plan, informed consent form, clinical study report, analytic code. | Study protocol, statistical analysis plan, informed consent form will also be shared if requested.                                                                                            |
| 5                   | When will data availability begin?                                                                                                                 | From the publication date.                                                                                                                                                                    |
| 6                   | When will data availability end?                                                                                                                   | A year within the publication date, since the technique or survival date may be updated over time.                                                                                            |
| 7                   | To whom will you share the data?                                                                                                                   | Researchers who are interested in related studies and provide their research plan.                                                                                                            |
| 8                   | For what type of analysis or purpose?                                                                                                              | For analysis to evaluate the association between reproductive factors and lung cancer risk.                                                                                                   |
| 9                   | How or where can the data/documents be obtained?                                                                                                   | Emails could be sent to the address below to obtain the shared data: <a href="mailto:nli@cicams.ac.cn">nli@cicams.ac.cn</a>                                                                   |
| 10                  | Any other restrictions?                                                                                                                            | We may balance the potential benefits and risks for each request and then provide the data that could be shared.                                                                              |
