# Supplementary material for: Menstrual factors, reproductive history, and risk of lung cancer: a multi-center population-based cohort study in Chinese females
Source: PubMed Central journal article supplement — Transl Lung Cancer Res. 2021 Oct;10(10):3912–28. doi: 10.21037/tlcr-21-552 (PMC8577983; doi:10.21037/tlcr-21-552), 2021-10
Supplement: tlcr-10-10-3912-supplementary.pdf [file tlcr-10-10-3912-supplementary.pdf]

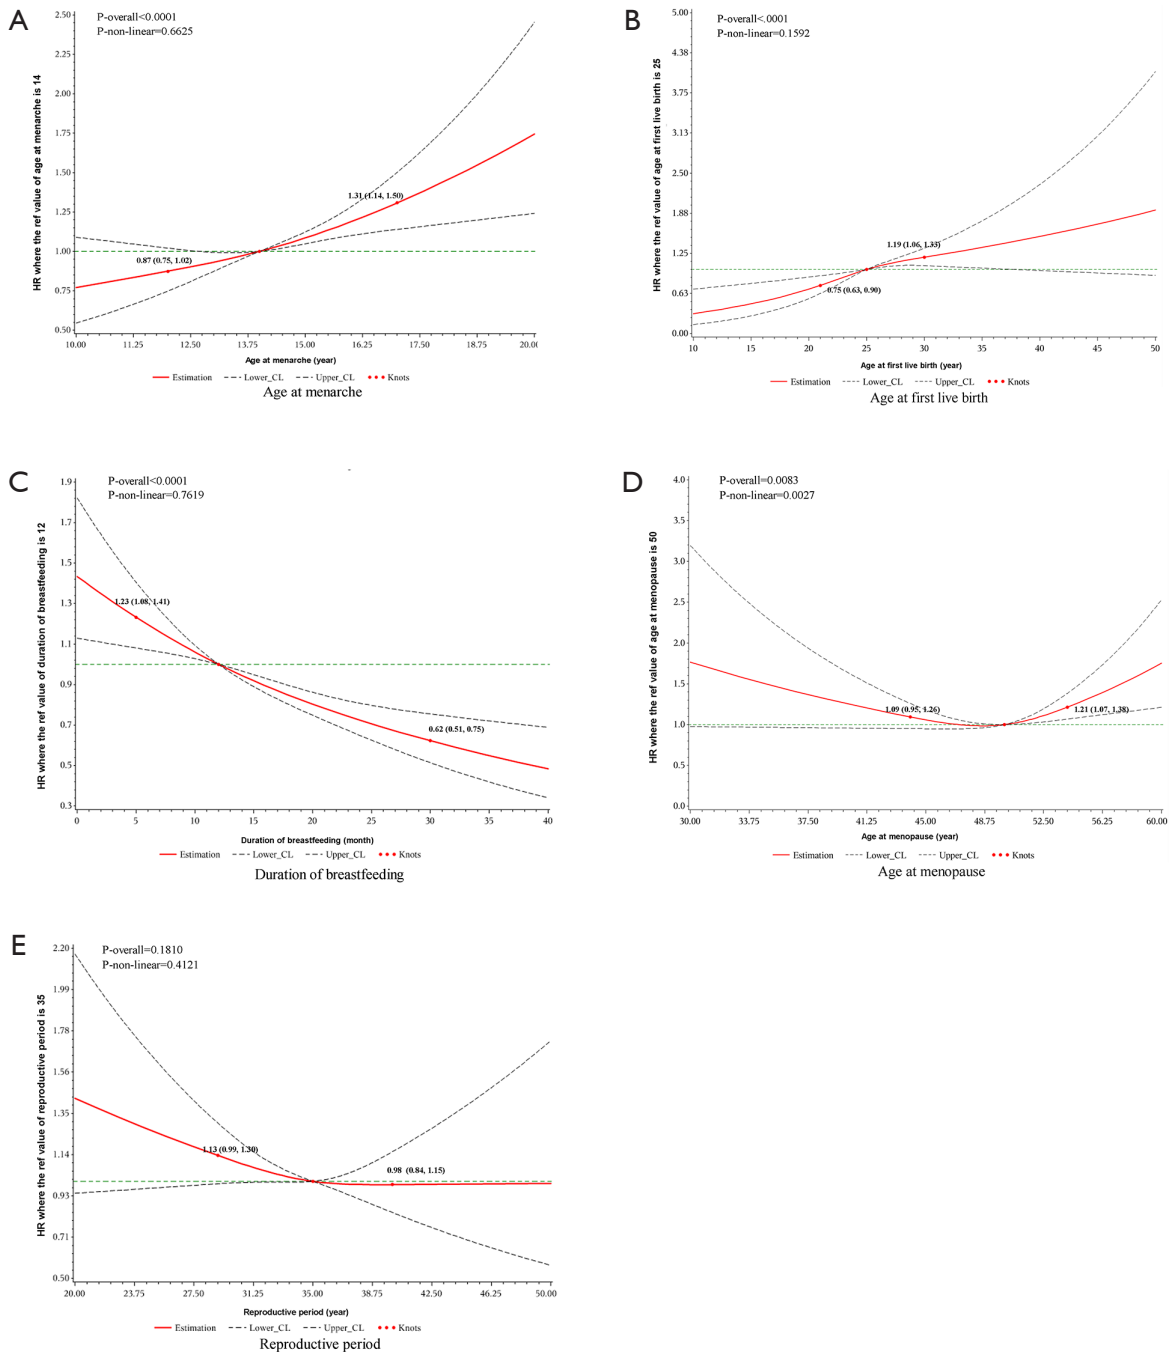

**Figure S1** Cubic spline graph of the adjusted HR (represented by solid line) and 95% CI (represented by the dotted lines) for the association between menstrual and reproductive factors and adenocarcinoma risk. (A) Age at menarche, reference: 14 years old; (B) age at first live birth, reference: 25 years old; (C) duration of breastfeeding, reference: 12 months; (D) Age at menopause, reference: 50 years old; (E) reproductive period, reference: 35 years. Knots: 5th, 50th, 95th of the distribution. Analyses are adjusted for age at enrollment (continuous), education (low, medium, or high), BMI (underweight, normal, overweight or obese), smoking status (current, former or never-smoker), exposures to environmental tobacco smoke (yes or no), exposure to cooking smoke (none, little, some, or much), occupational exposures (yes or no), history of chronic respiratory disease (yes or no) and family history of lung cancer (yes or no).

**Table S1** Characteristics and main findings of existed studies on the associations between menstrual, reproductive factors and lung cancer risk

| Author                       | Study name                                             | Country         | Premenopausal Status        | Number of participants | Never-smokers | Lung cancer cases | Years at enrollment | Median follow-up years | Main findings                                                                                                                                                                               |
|------------------------------|--------------------------------------------------------|-----------------|-----------------------------|------------------------|---------------|-------------------|---------------------|------------------------|---------------------------------------------------------------------------------------------------------------------------------------------------------------------------------------------|
| Gallagher <i>et al.</i> 2013 | Cohort Study of Shanghai female textile workers        | Shanghai, China | Both pre and postmenopausal | 267,400                | N.A.          | 824               | 1989-1991           | 9.3                    | Increased lung cancer risk: surgical menopause.<br>Decreased lung cancer risk: parity.                                                                                                      |
| Weiss <i>et al.</i> 2008     | Shanghai Women's Health Study                          | Shanghai, China | Both pre and postmenopausal | 71,314                 | 71,314        | 220               | 1996-2000           | 4.1                    | Decreased lung cancer risk: later age at menopause, longer reproductive period, higher parity, intrauterine device use.                                                                     |
| Tan <i>et al.</i> 2015       | The Singapore Breast Cancer Screening Project          | Singapore       | Postmenopausal              | 28,222                 | 26,473        | 311               | 1994.10-1997.02     | 15.8                   | Decreased lung cancer risk: higher parity.                                                                                                                                                  |
| Seow <i>et al.</i> 2009      | The Singapore Chinese Health Study                     | Singapore       | Postmenopausal              | 35,298                 | N.A.          | 298               | 1993.04-1998.12     | 9.6                    | Decreased lung cancer risk: higher parity.                                                                                                                                                  |
| Jeon <i>et al.</i> 2020      | The Korean National Health Insurance System based      | Korea           | Postmenopausal              | 4,775,398              | 4,335,259     | 16,556            | 2009-2014           | 4.4                    | Nonsignificant associations.                                                                                                                                                                |
| Wilunda <i>et al.</i> 2021   | The Japan Public Health Center-based Prospective Study | Japan           | Both pre and postmenopausal | 42,615                 | 42,615        | 400               | 1990-1994           | 21                     | Increased lung cancer risk (adenocarcinoma specific): longer fertility span, late age at menopause, natural menopause, or surgical menopause.<br>Decreased lung cancer risk: breastfeeding. |
| Lui <i>et al.</i> 2005       | The Japan Public Health Center-based Prospective Study | Japan           | Both pre and postmenopausal | 44,677                 | 44,677        | 153               | 1990-1994           | 8-12                   | Increased lung cancer risk: early age at menarche and late age at menopause.                                                                                                                |
| Schwartz <i>et al.</i> 2015  | The Women's Health Initiative studies                  | U.S.            | Postmenopausal              | 160,855                | 81,031        | 2,467             | 1993.10-1998.12     | 14                     | Decreased lung cancer risk: later age at menopause, higher parity.                                                                                                                          |
| Brinton <i>et al.</i> 2011   | The NIH-AARP Diet and Health Study                     | U.S.            | Postmenopausal              | 185,017                | 84,262        | 3,512             | 1995-1996           | 5.7                    | Increased risk: early age at ovarian cessation.<br>Decreased lung cancer risk: later age at menarche.                                                                                       |
| Baik <i>et al.</i> 2010      | The Nurses' Health Study                               | U.S.            | Postmenopausal              | 107,171                | 48,227        | 1,729             | 1984                | 22                     | Increased lung cancer risk: earlier age at menopause, exogenous hormone use, age at first birth (among never smokers).<br>Decreased lung cancer risk: parity (among never smokers).         |
| Kabat <i>et al.</i> 2007     | Canadian National Breast Screening Study               | Canada          | Postmenopausal              | 89,812                 | 45,065        | 750               | 1980-1985           | 16.4                   | Increased lung cancer risk: higher parity.<br>Decreased lung cancer risk: later age at first live birth.                                                                                    |
